# Supplementary material
Source: publisher figshare collection journal article supplement (https://brill.figshare.com/ndownloader/files/8197919)

# **Serotonergic Modulation of Sensory and Multisensory Processing in Superior Colliculus**

**LeAnne R. Kurela<sup>1</sup> and Mark T. Wallace<sup>1-4,\*</sup>**

<sup>1</sup> Vanderbilt Brain Institute,

<sup>2</sup> Department of Hearing & Speech Sciences, <sup>3</sup> Department of Psychology, <sup>4</sup> Department of  
Psychiatry,

Vanderbilt University, Nashville, TN 37232, USA

## **Supplementary Material**

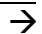

**Supplementary Figure S1.** Example responses of visual, auditory and audiovisual SC multisensory neurons. Peristimulus-time histograms (PSTHs) from an example visual (A), auditory (B) and audiovisual (C) multisensory neuron showing responsiveness to sensory stimulus presentations before (pre), 10 minutes following (peri) and 3.5 hours following (post) DOI injection. Bar graphs to the right are plotting response per trial (resp/trial) and integrative index (ii). The administration of DOI induces an increase in both resp/trial and ii in all three neuronal types.

A

## Visual neuron

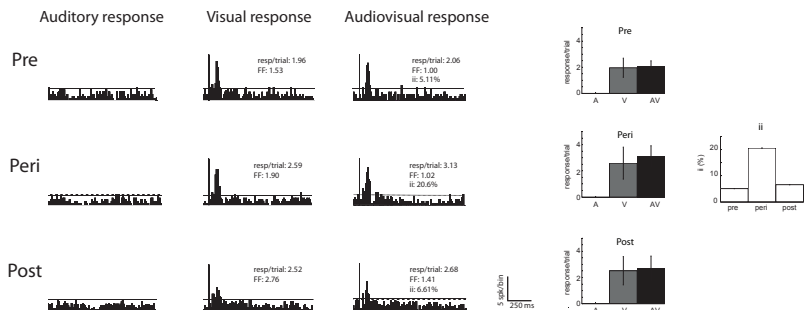

B

## Auditory neuron

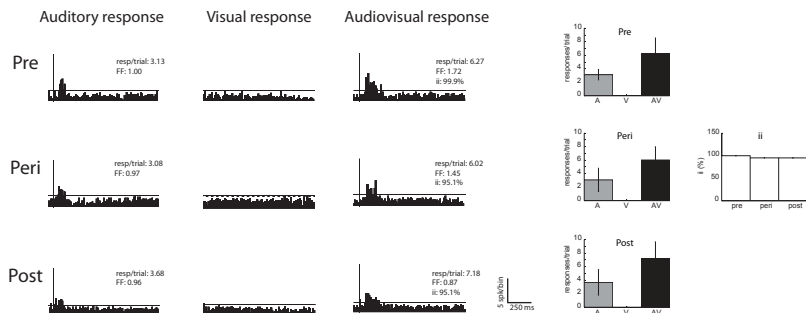

C

## Audiovisual neuron

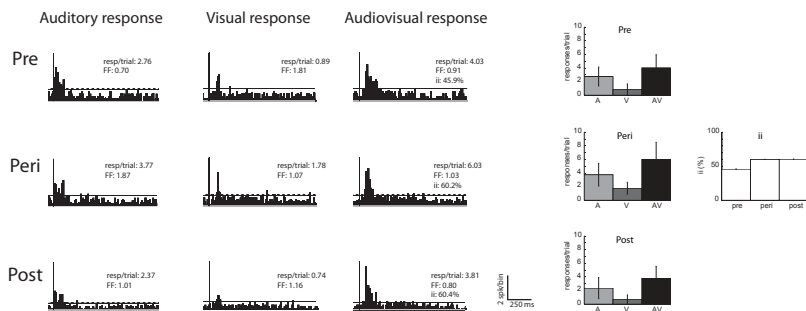

Supplement: Supplementary file 1 [file 8197919]
